# Supplementary material
Source: PubMed Central journal article supplement (PMC8218729)

# **SUPPLEMENTARY FILE**

**with**

## **Diagnostic performance of the novel BioPlex Lyme serological assays in European patients with Lyme borreliosis**

M.E. (Ewoud) Baarsma<sup>a</sup>; Jeanine Ursinus<sup>a</sup>; Hans L. Zaaijer<sup>b</sup>;  
Herman Kuiper<sup>c,d</sup>; Joppe W. Hovius<sup>a</sup>

### **Affiliations**

- a. Amsterdam UMC, University of Amsterdam, Center for Experimental and Molecular Medicine, Amsterdam Infection & Immunity Institute, Amsterdam, the Netherlands
- b. Sanquin Research, Department of Blood-borne Infections, Amsterdam, the Netherlands
- c. Amsterdam UMC, University of Amsterdam, Department of Medical Microbiology, Amsterdam, the Netherlands
- d. Amsterdam UMC, University of Amsterdam, Department of Neurology, Amsterdam, the Netherlands

**SUPPLEMENTARY TABLE 1: Sensitivity of all algorithms in disseminated LB**

|                            | Acute (n=7)                       |           | Early convalescent (n=11)         |           | Late convalescent (n=60)          |           | All time points combined (n=70)   |           |
|----------------------------|-----------------------------------|-----------|-----------------------------------|-----------|-----------------------------------|-----------|-----------------------------------|-----------|
|                            | No. true positive (sensitivity %) | 95%-CI    |
| <b>Biopl-IgM</b>           | 4 (57.1)                          | 18.4-90.1 | 8 (72.7)                          | 39.0-94.0 | 35 (58.3)                         | 44.9-70.9 | 42 (60.0)                         | 47.6-71.5 |
| <b>Biopl-IgG</b>           | 6 (85.7)                          | 42.1-99.6 | 11 (100)                          | 71.5-100  | 56 (93.3)                         | 83.8-98.2 | 66 (94.3)                         | 86.0-98.4 |
| <b>Eur-IgM</b>             | 3 (42.9)                          | 9.9-81.6  | 4 (36.4)                          | 10.9-69.2 | 30 (50.0)                         | 36.8-63.2 | 35 (50.0)                         | 37.8-62.2 |
| <b>Eur-IgG</b>             | 6 (85.7)                          | 42.1-99.6 | 11 (100)                          | 71.5-100  | 56 (93.3)                         | 83.8-98.2 | 67 (95.7)                         | 88.0-99.1 |
| <b>Single: Biopl-total</b> | 6 (85.7)                          | 42.1-99.6 | 11 (100)                          | 71.5-100  | 58 (96.7)                         | 88.5-99.6 | 68 (97.1)                         | 90.2-99.7 |
| <b>Single: Eur-total</b>   | 6 (85.7)                          | 42.1-99.6 | 11 (100)                          | 71.5-100  | 56 (93.3)                         | 83.8-98.2 | 67 (95.7)                         | 88.0-99.1 |
| <b>Single: C6</b>          | 6 (85.7)                          | 42.1-99.6 | 11 (100)                          | 71.5-100  | 57 (95.0)                         | 86.1-99.0 | 67 (95.7)                         | 88.0-99.1 |
| <b>STTT: Biopl/blot</b>    | 5 (71.4)                          | 29.0-96.3 | 8 (72.7)                          | 39.0-94.0 | 48 (80.0)                         | 67.7-89.2 | 57 (81.4)                         | 70.3-89.7 |
| <b>STTT: Eur/blot</b>      | 5 (71.4)                          | 29.0-96.3 | 8 (72.7)                          | 39.0-94.0 | 48 (80.0)                         | 67.7-89.2 | 57 (81.4)                         | 70.3-89.7 |
| <b>STTT: C6/blot</b>       | 5 (71.4)                          | 29.0-96.3 | 8 (72.7)                          | 39.0-94.0 | 48 (80.0)                         | 67.7-89.2 | 57 (81.4)                         | 70.3-89.7 |
| <b>MTTT: Biopl/C6</b>      | 6 (85.7)                          | 42.1-99.6 | 11 (100)                          | 71.5-100  | 56 (93.3)                         | 83.8-98.2 | 66 (94.3)                         | 86.0-98.4 |
| <b>MTTT: Eur/C6</b>        | 6 (85.7)                          | 42.1-99.6 | 11 (100)                          | 71.5-100  | 54 (90.0)                         | 79.5-96.2 | 65 (92.9)                         | 84.1-97.6 |
| <b>Biopl-IgG only</b>      | 6 (85.7)                          | 42.1-99.6 | 11 (100)                          | 71.5-100  | 56 (93.3)                         | 83.8-98.2 | 66 (94.3)                         | 86.0-98.4 |

All comparisons between assays within time points/algorithms were  $p>0.05$ .

A test result was considered to be (true) positive when either the IgM component, IgG component or both were positive. Equivocal first-tier EIA results were interpreted as positive. For the combined sensitivity of all time points, a patient was scored positive if one or more time points were positive.

Abbreviations/explanations: single: single-tier; STTT: standard two-tier testing; MTTT: modified two-tier testing; 95%-CI: 95% confidence interval; Biopl: Bioplex; Eur: Euroimmun; C6: C6-ELISA; blot: recomLine immunoblot

### SUPPLEMENTARY FIGURE 1a-c: reactivity of BioPlex and Euroimmun assays per component (IgM/IgG)

Reactivity is shown for the BioPlex and Euroimmun assays for each serum group and each time point. The C6-ELISA is not shown as it has no separate IgM/IgG components. Sample sizes are given in the main text and in Tables 2 & 3.

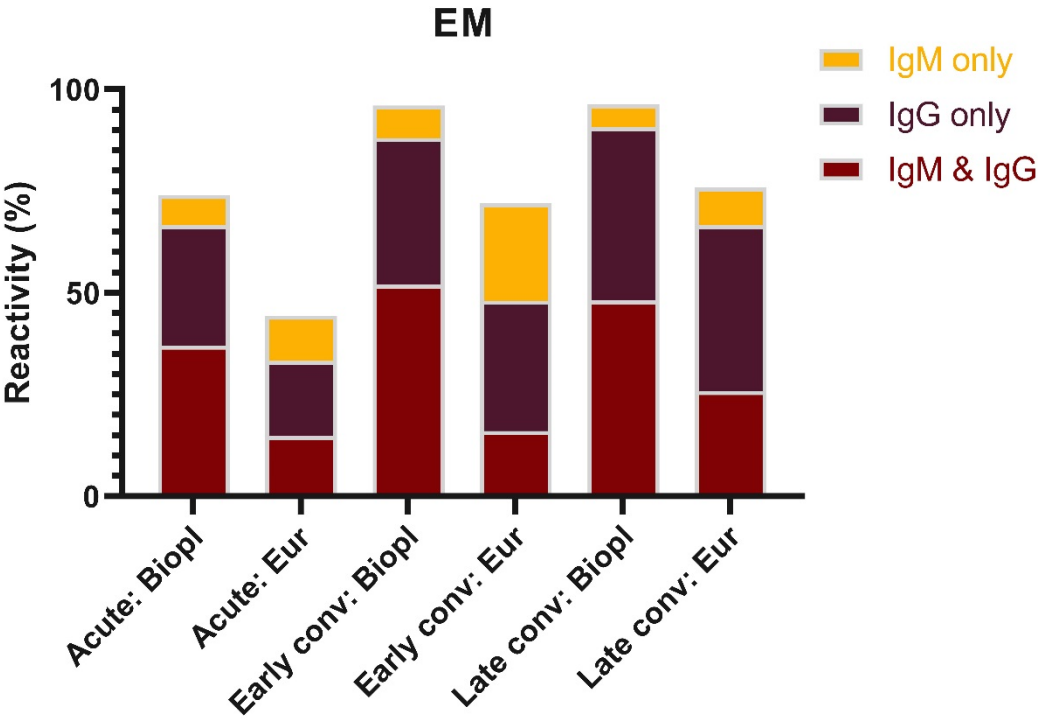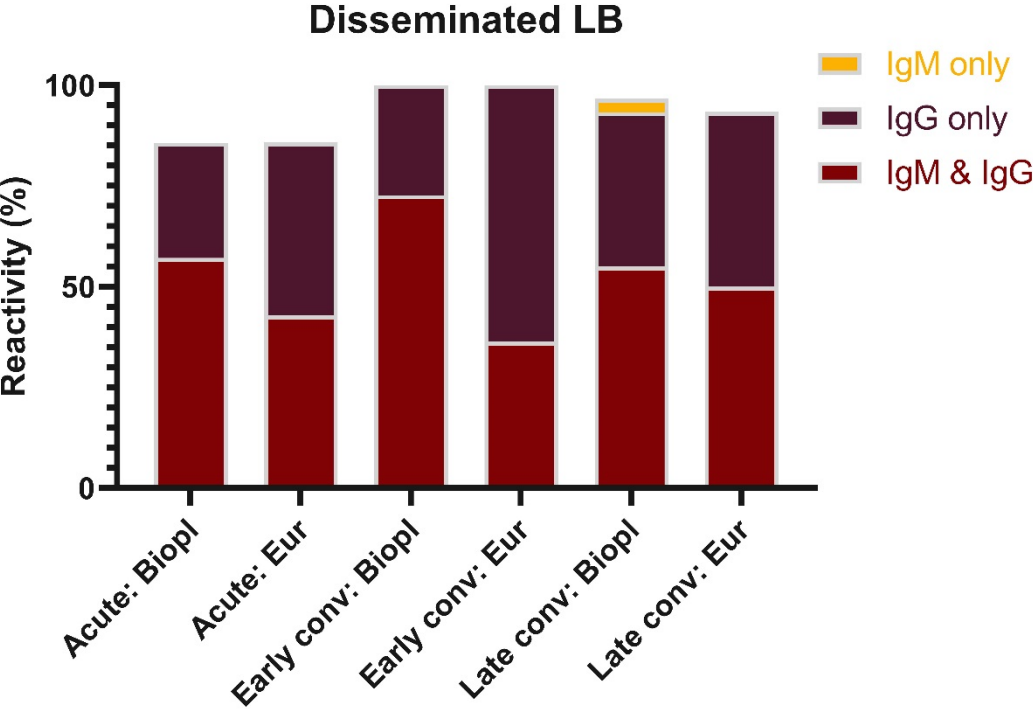

### HBDs

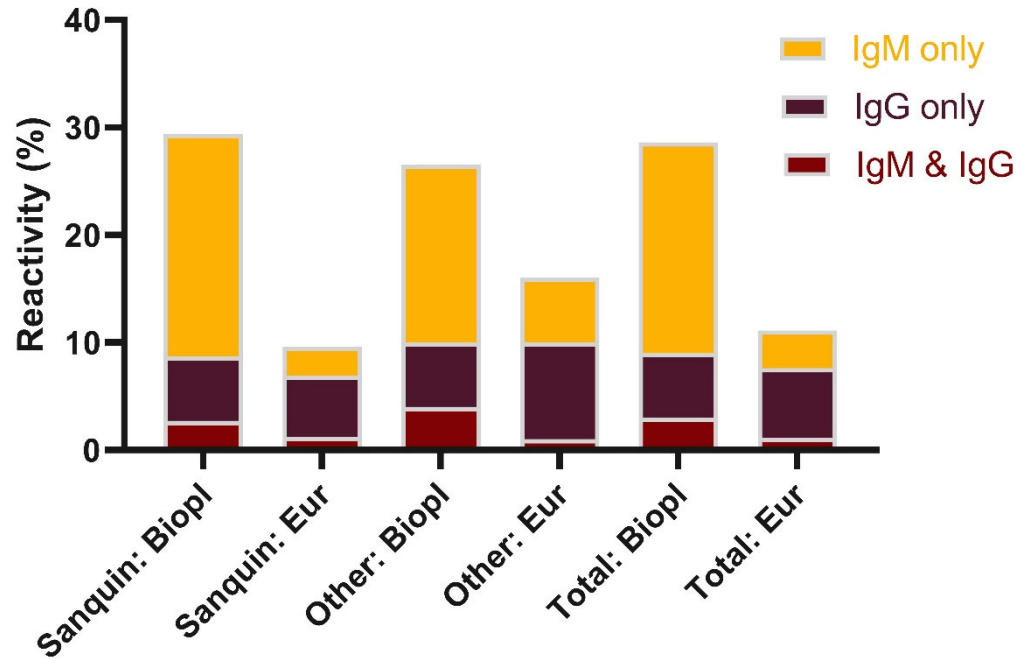

## SUPPLEMENTARY FIGURE 2a-f: Quantitative results of each BioPlex antigen in HBDs and cases

Quantitative results are shown for each BioPlex antigen in the IgM and IgG component in all HBDs (n=800), acute LB samples (n=34), early convalescent LB samples (n=36) and late convalescent LB samples (n=114). The assay range for IgM antigens is 0.2 to 4.0 and for IgG antigens 0.2 to 8.0. Values  $\geq 1.1$  are positive; values 0.9-1.0 are equivocal.

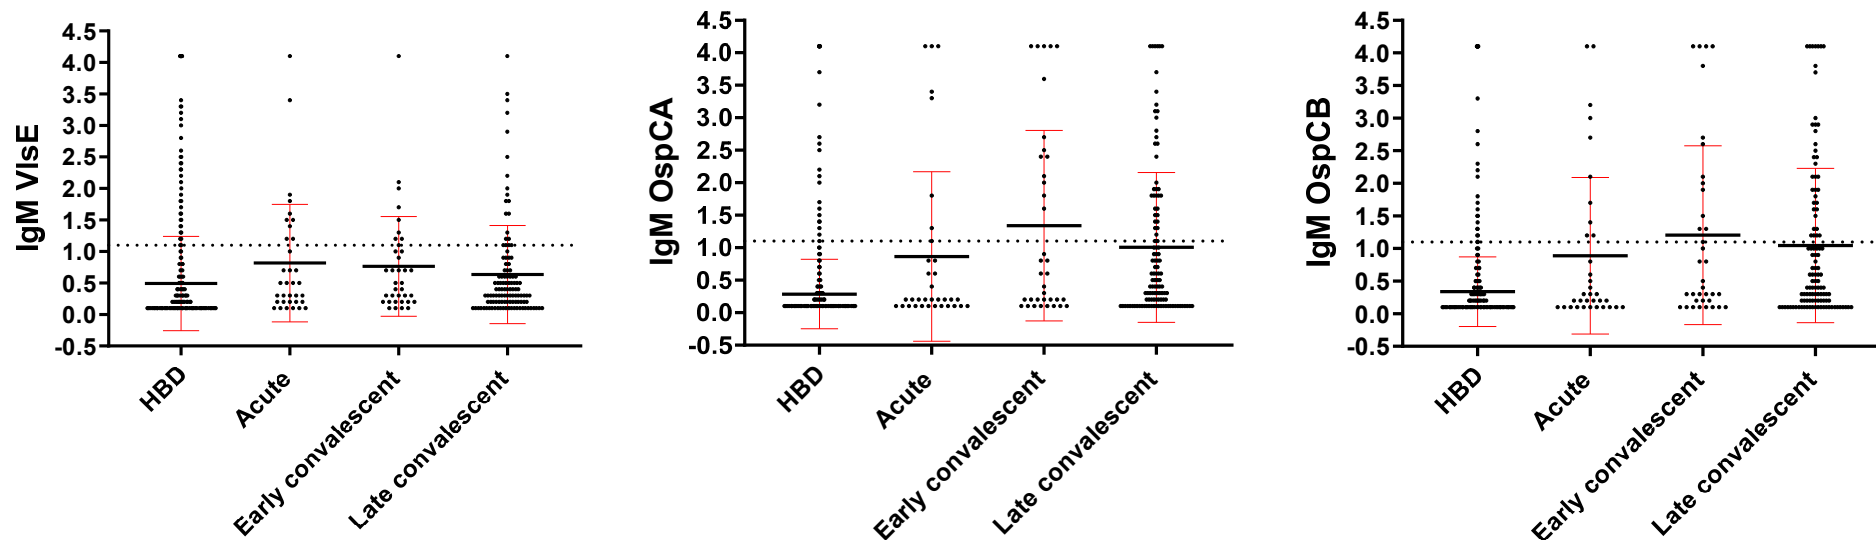

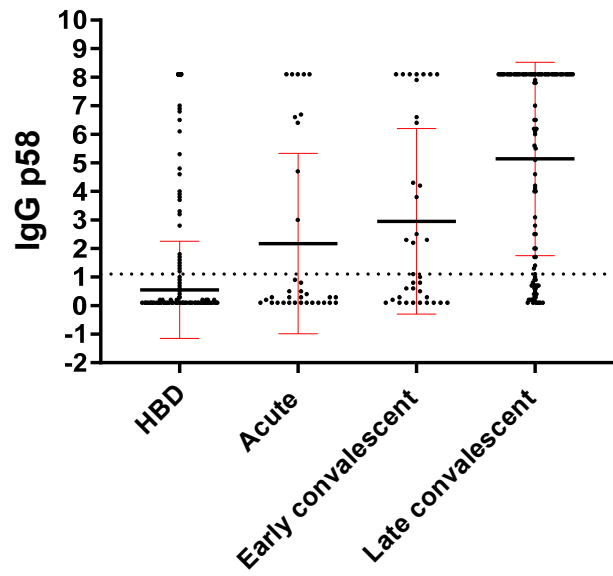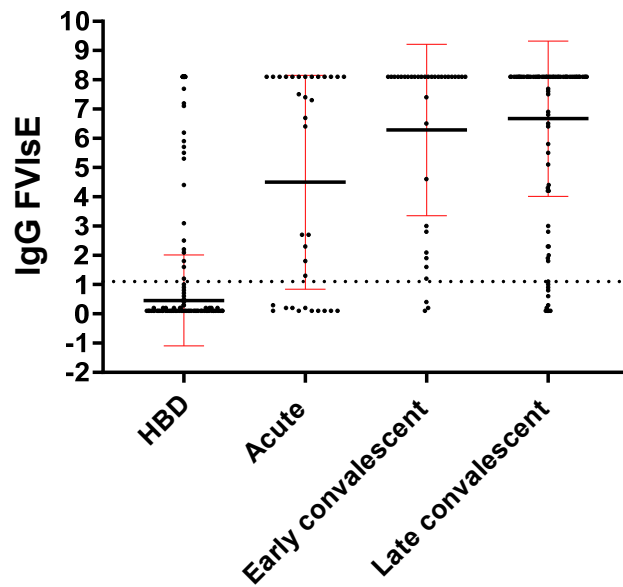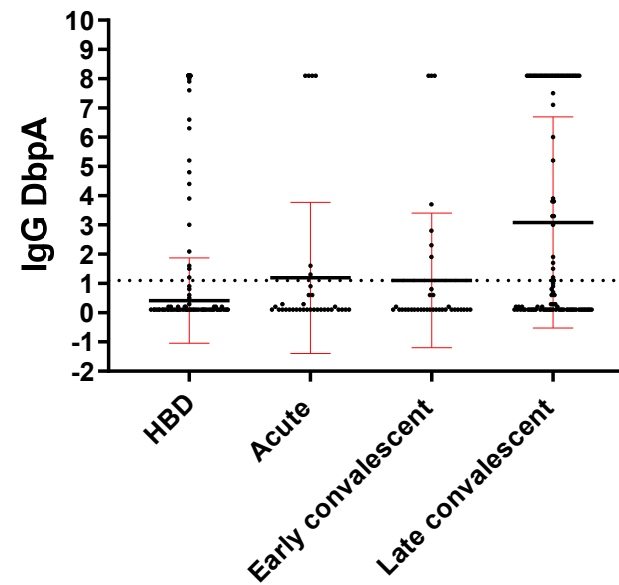

### SUPPLEMENTARY FIGURE 3: ROC-analysis for BioPlex antigens

This figure shows ROC-curves for all HBDs (n=800) vs. the first serum of each EM patient (n=88). Sera from cases with disseminated LB were excluded, as were subsequent sera from EM patients. Diagonal segments are produced by ties.

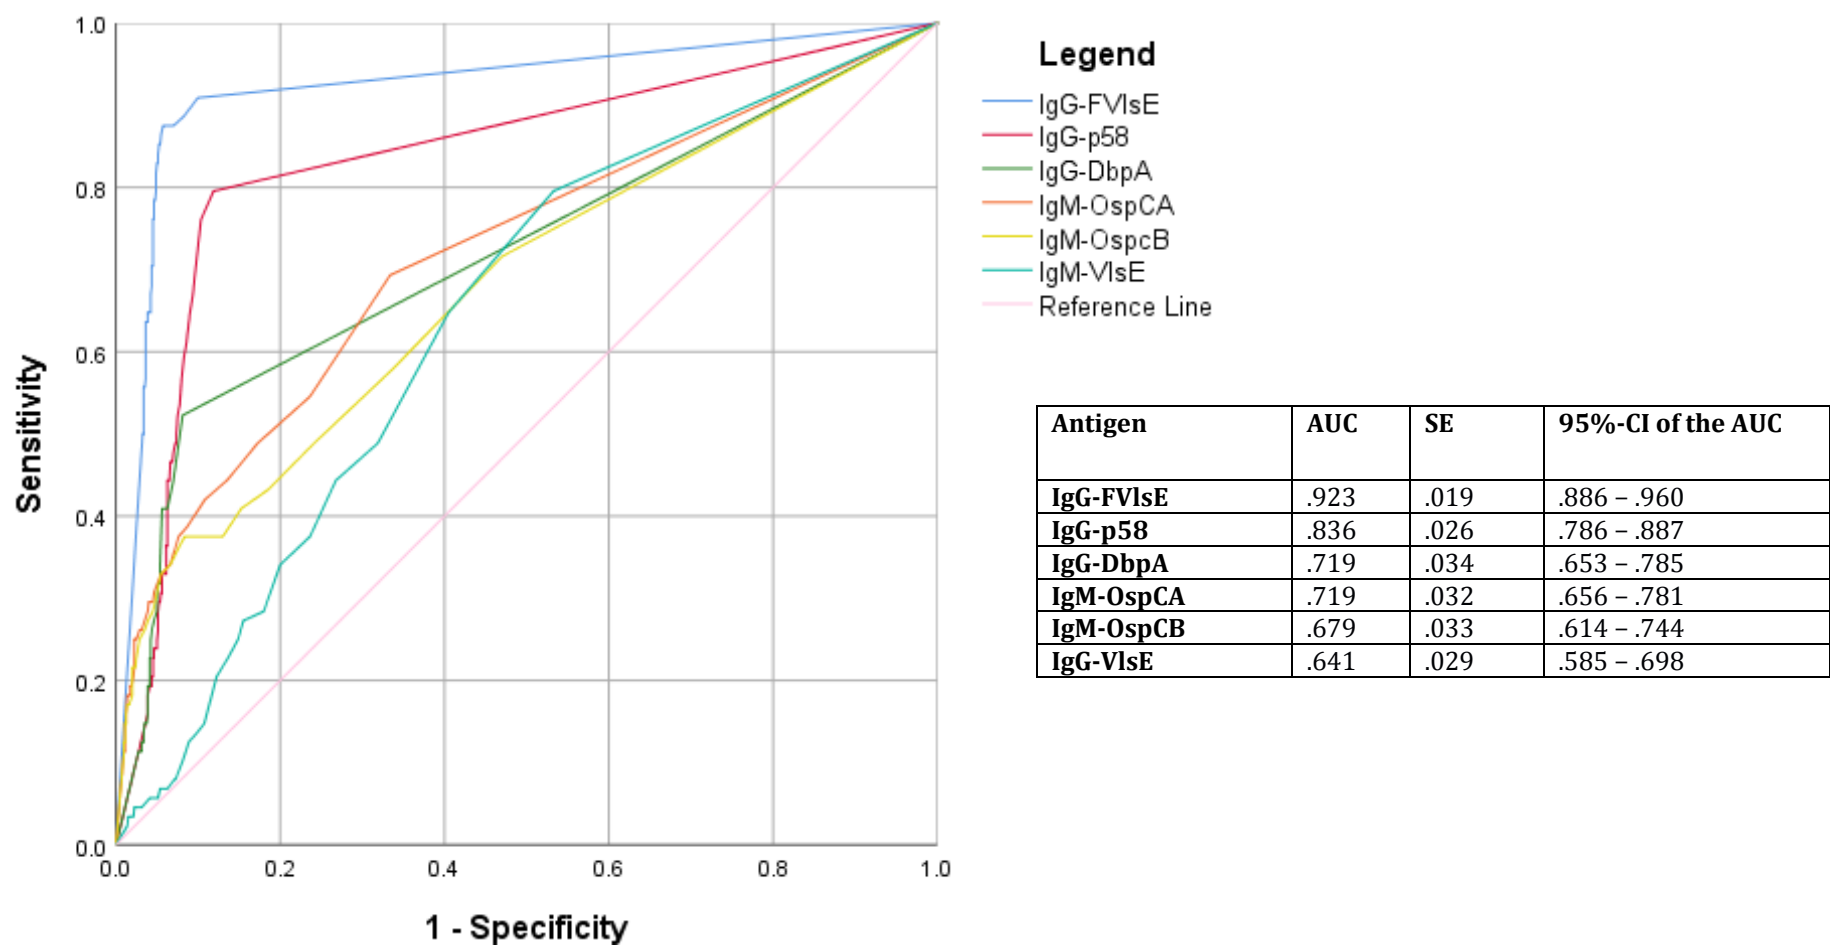

Supplement: jcm.03205-20-s0001.pdf [file jcm.03205-20-s0001.pdf]
